# Supplementary material
Source: ML conference proceedings conference paper supplement (https://openaccess.thecvf.com/content/CVPR2024/html/Li_LASO_Language-guided_Affordance_CVPR_2024_paper.html)
Supplement: Supplementary file 1 [file Li_LASO_Language-guided_Affordance_CVPR_2024_supplemental.pdf]

# LASO: Language-guided Affordance Segmentation on 3D Object

## Supplementary Material

Table 6. The removed object(s) for each affordance type.

| Affordance | Removed Objects     | # Removed |
|------------|---------------------|-----------|
| contain    | microwave, vase     | 508       |
| cut        | scissors            | 49        |
| display    | display             | 488       |
| grasp      | mug, scissors       | 199       |
| move       | table               | 1389      |
| open       | microwave, trashcan | 297       |
| pour       | mug, trashcan       | 379       |
| press      | keyboard            | 125       |
| stab       | scissors            | 51        |
| support    | chair               | 1848      |
| wrap_grasp | vase                | 381       |

### 7.1. Dataset Setting

To challenge the generalization ability of the model, we create the unseen setting, by omitting samples of certain object classes from the seen setting. Specifically, for an affordance type, we omit its combination with certain objects from seen if there is more than one object class associated with this affordance type. For example, the seen partition has samples of “grasp-mug”, and “grasp-bag” in its training, we create the unseen training set by removing the “grasp-mug” from the seen training set. In this case, the model is expected to learn the generalizable affordance knowledge of “grasp” and transfer it to an unseen object during testing. Note that the seen and unseen settings share the same validation and testing set. The omitted object classes for each affordance type are shown in Tab. 6:

### 7.2. Evaluation Metrics

In LASO, we employ four evaluation metrics: mIoU, AUC, SIM, and MAE. Here’s a detailed explanation of each:

- **mIoU (Mean Intersection Over Union):** A common metric for segmentation tasks, mIoU quantifies the overlap between the predicted segmentation areas and the ground truth. It calculates the average Intersection Over Union (IoU) across all samples, reflecting the model’s overall segmentation performance.
- **AUC (Area Under the Curve):** In the context of LASO, AUC assesses the model’s ability to differentiate between the affordance and non-affordance parts of an object. It evaluates the model’s classification performance at various thresholds, indicating how well the model can discern

relevant object parts across different scenarios.

- **SIM (Similarity):** For LASO, this metric evaluates how closely the model’s segmentation aligns with the actual affordance area mentioned in the question. It provides insight into the model’s effectiveness in interpreting the question and accurately mapping it to the corresponding spatial regions.

$$\text{SIM}(Y, M) = \sum_i^n \min(Y_i, M_i), \quad (11)$$

$$\text{s.t. } \sum_i^n Y_i = \sum_i^n M_i = 1, \quad (12)$$

where  $Y$  and  $M$  denote the ground truth and predictive segmentation, respectively.  $n$  is the total number of points.

- **MAE (Mean Absolute Error):** In LASO, MAE measures the average magnitude of errors in the model’s affordance segmentation, without considering the error direction. It’s a key indicator of the model’s overall accuracy in segmenting the object part related to the query, reflecting how precisely the model can follow the affordance cues provided in the natural language question.

$$\text{MAE}(Y, M) = \sum_i^n |Y_i - M_i|, \quad (13)$$

where  $n$  is the total number of points.  $Y$  and  $M$  are the ground truth and predictive segmentation, respectively.

### 7.3. Baselines

Given the absence of existing research using paired question-point cloud data for object affordance segmentation, we adapt two methods from 3D cross-modal research—3D-SPS [26] and IAGNet [44]; and two from referred image segmentation—ReferTrans [15] and ReLA [22], for a comprehensive evaluation of our LASO task.

- **IAGNet [44]** Closely related to LASO, IAGNet was developed for grounding 3D object affordance from 2D image interactions. We adapted IAGNet for LASO by replacing its image backbone with a language model, while retaining the rest of its structure.
- **3D-SPS[26]** Originally a 3D visual grounding method designed to locate target objects in point cloud scenes based on language descriptions, 3D-SPS progressively selects keypoints under linguistic guidance. To fit LASO’s segmentation framework, we removed its bounding box prediction module, adapting the remainder to process object point clouds for affordance segmentation.

Table 7. Performance of PointRefer for each affordance type.

|        | Metric | lay   | sit   | support | grasp | lift  | contain | open  | wrap_grasp | pour  | move  | display | push  | pull  | listen | wear  | press | cut   | stab  |
|--------|--------|-------|-------|---------|-------|-------|---------|-------|------------|-------|-------|---------|-------|-------|--------|-------|-------|-------|-------|
| Seen   | IOU    | 18.5  | 39.3  | 20.2    | 18.0  | 29.1  | 23.8    | 24.1  | 4.6        | 18.2  | 10.4  | 32.0    | 8.1   | 23.3  | 19.0   | 3.9   | 15.2  | 12.3  | 32.8  |
|        | AUC    | 87.7  | 96.2  | 90.3    | 82.7  | 92.4  | 88.8    | 91.5  | 68.9       | 89.7  | 78.9  | 92.4    | 85.0  | 83.7  | 92.7   | 68.6  | 93.7  | 93.5  | 99.2  |
|        | SIM    | 0.642 | 0.739 | 0.714   | 0.595 | 0.403 | 0.607   | 0.428 | 0.714      | 0.65  | 0.579 | 0.644   | 0.417 | 0.241 | 0.639  | 0.618 | 0.488 | 0.751 | 0.541 |
|        | MAE    | 0.101 | 0.067 | 0.085   | 0.115 | 0.066 | 0.096   | 0.05  | 0.131      | 0.086 | 0.134 | 0.076   | 0.078 | 0.039 | 0.111  | 0.146 | 0.046 | 0.073 | 0.022 |
| Unseen | IOU    | 16.5  | 32.7  | 10.5    | 11.5  | 27.0  | 18.6    | 17.3  | 2.8        | 12.7  | 6.7   | 24.2    | 6.9   | 13.2  | 17.7   | 2.8   | 11.8  | 6.5   | 25.8  |
|        | AUC    | 74.8  | 81.7  | 76.1    | 65.8  | 82.5  | 74.3    | 75.6  | 49.9       | 68.4  | 58.2  | 76.5    | 71.5  | 73.4  | 80.1   | 57.1  | 78.3  | 77.1  | 81.6  |
|        | SIM    | 0.563 | 0.630 | 0.588   | 0.453 | 0.396 | 0.490   | 0.328 | 0.462      | 0.495 | 0.448 | 0.496   | 0.378 | 0.194 | 0.557  | 0.502 | 0.386 | 0.576 | 0.402 |
|        | MAE    | 0.081 | 0.056 | 0.070   | 0.109 | 0.036 | 0.082   | 0.048 | 0.145      | 0.085 | 0.128 | 0.081   | 0.065 | 0.037 | 0.082  | 0.126 | 0.042 | 0.052 | 0.026 |

- **ReLA [22]** Originating from image-based referring expression segmentation, ReLA’s goal is to segment objects as described by a language expression. For LASO, we substituted its image backbone with a 3D counterpart and adapted the image region features to grouped point features, preserving its cross-modal fusion and mask decoding strategies.
- **ReferTrans [15]** A versatile, transformer-based architecture for image-based expression segmentation, ReferTrans was adjusted for LASO by replacing the image backbone with a 3D one and modifying it to support only mask prediction, removing the detection head.

#### 7.4. Detailed Result

To have a deeper understanding of PointRefer’s learning pattern, we analyze its performance on each affordance type, and the result is presented in Tab. 7. Our observations are as follows:

- **Comparative Analysis.** The comparative analysis of PointRefer’s performance across different affordance types offers critical insights into the model’s learning dynamics. In both the “Seen” and “Unseen” datasets, affordance types like “lift”, and “display” show strong results, especially in metrics such as IOU and AUC. This trend might be attributed to the limited variety of objects these affordances cover and their relatively straightforward patterns, like a “handle” for “lift”. Conversely, affordance types like “wear,” “push”, and “wrap\_grasp” exhibit less satisfactory performance, likely due to the absence of a distinct functional part or the need for learning deformable patterns, posing a challenge in determining the focus areas for segmentation. Moving forward, it’s clear that our efforts should concentrate on enhancing the model’s capability to handle these less-performing affordance types, addressing their unique challenges to achieve a more comprehensive and robust performance.
- **Trend Analysis.** Overall, PointRefer showcases superior performance in the “Seen” dataset compared to the “Unseen” across various affordance types, yet it maintains a consistent pattern in both datasets. This uniformity

highlights PointRefer’s capacity to generalize and effectively apply learned affordance knowledge to previously unseen objects. Upon closer inspection of the “Seen” and “Unseen” results, we find that certain affordances, like “grasp”, exhibit stable performance, indicative of a well-generalized understanding. In contrast, performance variations in affordances such as “support” in the “Unseen” setting reveal inherent challenges. We believe that the broader coverage of object categories for affordances like “grasp” (encompassing seven different categories in the “Seen” setting) as opposed to “support” (covering only two categories) enables the model to develop a more generalized understanding, leading to enhanced performance in “Unseen” scenarios.

Notably, even when we exclude objects related to specific affordances in the “Unseen” setting, there is an observed decline in performance for all affordance types, including those that remain unchanged. This indicates that the model captures a generalized affordance knowledge that impacts its performance across the board, suggesting an interconnected learning approach that influences its efficacy across all types of affordance.

#### 7.5. More Visualization Results

In Figure Fig. 9, we present additional visualizations of PointRefer’s predictions. Notably, PointRefer demonstrates the capability to yield diverse segmentation outcomes for the same type of object (e.g., bottles, bowls, knives) in response to different questions. This variability underscores the effectiveness of our question-guided approach in the model’s design.

Furthermore, PointRefer effectively segments the affordance parts of objects within the same category, accommodating various shapes and sizes. For instance, when tasked with identifying the “door knob” on different doors, PointRefer consistently and accurately segments these regions, regardless of their distinct appearances. This ability to adapt to different affordance representations in similar object categories highlights PointRefer’s robust generalization capabilities.

Considering the structure of the bed, what area would be most stable for laying?

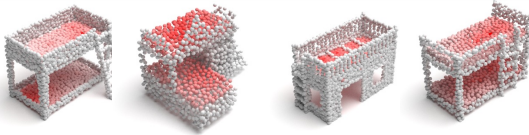

If you want to put something in the bowl, at which points in the bowl would you put it?

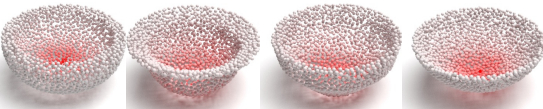

If you want to listen to music with headphones, which points on the headphones will point to your ears?

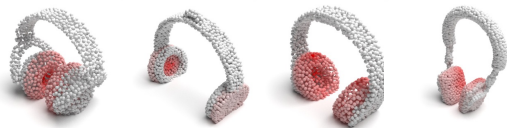

If you want to cut something with this knife, which points on the blade will come into contact with?

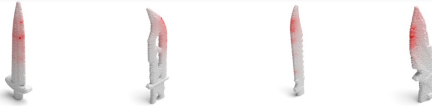

How to open up this bottle?

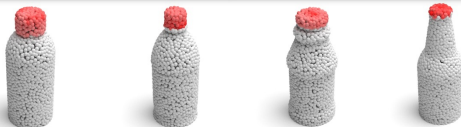

When sitting on a chair, which points of contact between your body and the chair should be prioritized for optimal comfort and support?

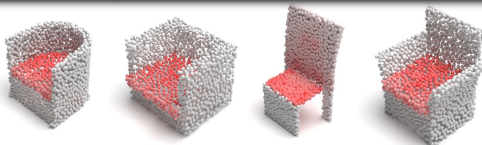

If you want to boil water, at which points on the tap would you open the water valve?

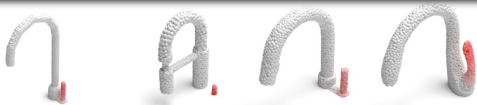

When typing on this computer, which part should your fingers apply pressure to?

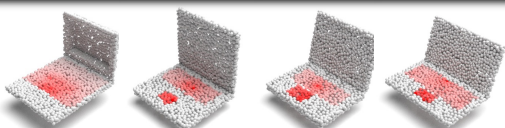

As you pour water into the bottle, which areas inside the bottle will the water contact with first?

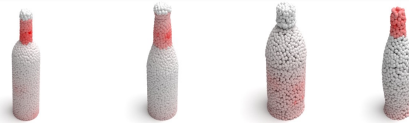

Suppose there is water in the bowl, and you want to pour the water out of the bowl, from which point will the water flow out?

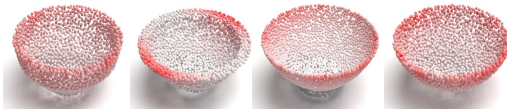

How to hold this faucet and carry it?

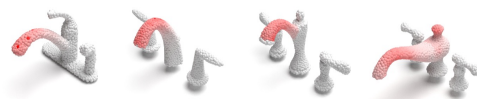

How to hold this knife with the best control and safety?

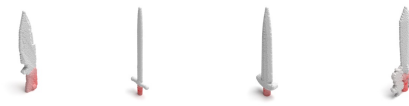

How to hold this bottle and carry it around?

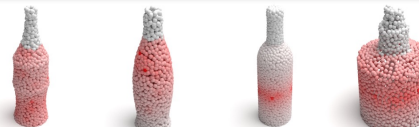

How can you go through this door?

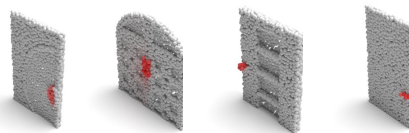

For a comfortable and proper fit, which sections of the hat will come into contact with your head when wearing it?

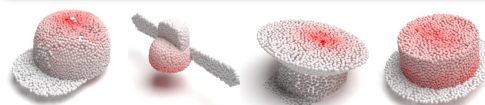

How could you hold this mug and carry it around?

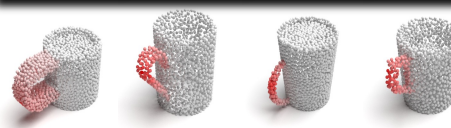

Figure 9. Case-Study of PointRefer's segmentation. Each showcase comes with one question and four shapes, showing the generalization of the prediction. The segmented affordance part is highlighted in red.
